# Supplementary material for: Wheat Rhizosphere Metagenome Reveals Newfound Potential Soil Zn-Mobilizing Bacteria Contributing to Cultivars’ Variation in Grain Zn Concentration
Source: Front Microbiol. 2021 Jun 23;12:689855. doi: 10.3389/fmicb.2021.689855 (PMC8261137; doi:10.3389/fmicb.2021.689855)
Supplement: Supplementary file 1 [file Table_1.XLSX]

## Sheet: Sheet1
Supplementary Table S1: Statistics of metagenome sequencing and assembly.
Samplea	Raw reads	Raw bases (bp)	Host removed Clean reads	Host removed clean bases (bp)	Number of contigs	Total contig length (bp)	Contig N50 (bp)	Read mapping to contigs (%)	Mapped reads to combined contigs	Read mapping rate to combined contigs (%)	Mapped reads to gene set	Read mapping rate to gene set (%)
yn-1	70954992	21286497600	62031398	17542031716	3661019	1882500988	493	58.62	54278998	87.5025	50358076	81.1816
zm-1	69246519	20773955700	59338490	16683187210	3069539	1736559890	559	62.24	5.30299e+07	89.3685	49557068	83.5159
hg-1	73251458	21975437400	62645113	17611000343	3300641	1724907327	507	55.52	5.45429e+07	87.0664	5.03315e+07	80.3438
jn-1	68181172	20454351600	58402561	16410833099	2973974	1618053861	523	62.46	52346895	89.6312	48978527	83.8637
b9-1	75037483	22511244900	64536946	18122381359	3231953	1720477347	520	55.98	56377065	87.3563	5.2188e+07	80.8654
xn-1	71196799	21359039700	61854646	17448782621	3539444	1877751237	511	61.24	55043233	88.988	5.13701e+07	83.0497
bk-1	67817700	20345310000	59023003	16658630013	3419193	1626091770	458	49.6	4.8811e+07	82.6983	4.41455e+07	74.7937
yn-2	67840520	20352156000	54796007	15215456663	3412692	1744009127	489	57.5	4.81296e+07	87.8341	4.44975e+07	81.2057
zm-2	64684860	19405458000	50517660	13902583703	2722572	1517816616	549	60.27	4.53318e+07	89.7346	42240442	83.6152
hg-2	68226098	20467829400	53319520	14681983977	2944171	1521607444	499	53.8	4.66342e+07	87.4617	4.28616e+07	80.3863
jn-2	66553063	19965918900	52780341	14602401220	2839660	1542170237	522	61.84	47459989	89.9198	44315232	83.9616
b9-2	69718810	20915643000	54488358	14976141683	2808821	1477430097	512	53.74	47808612	87.741	44062044	80.8651
xn-2	65933608	19780082400	52641581	14567561012	3160972	1663272559	506	59.42	4.70049e+07	89.2923	4.37346e+07	83.0799
bk-2	64831502	19449450600	51722949	14296868940	3089786	1455238608	454	47.9	4.30202e+07	83.1743	38655444	74.7356
yn-3	69220186	20766055800	57481010	15967423448	3393163	1738377487	491	57.42	50467361	87.7983	4.66625e+07	81.179
zm-3	68012504	20403751200	54774573	15081924641	2812504	1581302586	555	60.87	49125437	89.6866	45768365	83.5577
hg-3	71231834	21369550200	57353839	15802308284	3027036	1575145392	504	54.28	50136686	87.4164	4.60821e+07	80.3471
jn-3	68330568	20499170400	55814705	15451967809	2847981	1551406512	524	61.91	5.01747e+07	89.8952	4.68458e+07	83.9309
b9-3	73890101	22167030300	59557546	16375486107	2926370	1551302880	518	54.45	5.22325e+07	87.7009	48137932	80.8259
xn-3	69859162	20957748600	57408444	15894880248	3277564	1735939108	510	60.07	5.12431e+07	89.2605	4.76754e+07	83.046
bk-3	67124164	20137249200	55136025	15245808685	3134881	1483905138	456	48.16	4.583e+07	83.1217	41186905	74.7005
yn-4	71688417	21506525100	59430134	16622755280	3547712	1824643330	493	58.26	52142380	87.7373	48274997	81.2298
zm-4	68838672	20651601600	55332633	15342491378	2867757	1614511024	556	61.25	49590283	89.6221	4.62562e+07	83.5966
hg-4	71695941	21508782300	57616429	15984941532	3018857	1569558436	504	54.15	5.03257e+07	87.3461	46320954	80.3954
jn-4	68664187	20599256100	55967357	15600776106	2888540	1572112958	524	62.17	50274163	89.8277	4.6991e+07	83.9615
b9-4	73839990	22151997000	59437167	16457889364	2952361	1563769632	517	54.63	5.20849e+07	87.6302	4.80695e+07	80.8744
xn-4	70876438	21262931400	58133197	16208450954	3344033	1770330435	510	60.45	51860241	89.2093	48312372	83.1063
bk-4	67862811	20358843300	55642213	15494860070	3210584	1520956381	456	48.61	46203140	83.0361	41607419	74.7767
Total	1944609559	583382867700	1597183845	444251807465
un-1			223918739		15220253	8039694380	527	63.33
un-2			201846280		14138515	7463217421	526	63.6
un-3			215767809		14429736	7662887025	530	63.9
un-4			215974461		14620835	7750948493	529	63.84
Combined					166876821	109923227901	631
a b9, bei9; xn, xinong3517; zm, zhoumai24; yn, yannong0428; hg, hengguan35; jn, jinan17, bk, bulk soil; un, unmapped.
